# Supplementary material for: Similar image search for histopathology: SMILY
Source: PubMed Central journal article supplement (PMC6588631; doi:10.1038/s41746-019-0131-z), 2019-06-21
Supplement: 41746_2019_131_MOESM1_ESM.pdf [file 41746_2019_131_MOESM1_ESM.pdf]

## Supplementary Figures

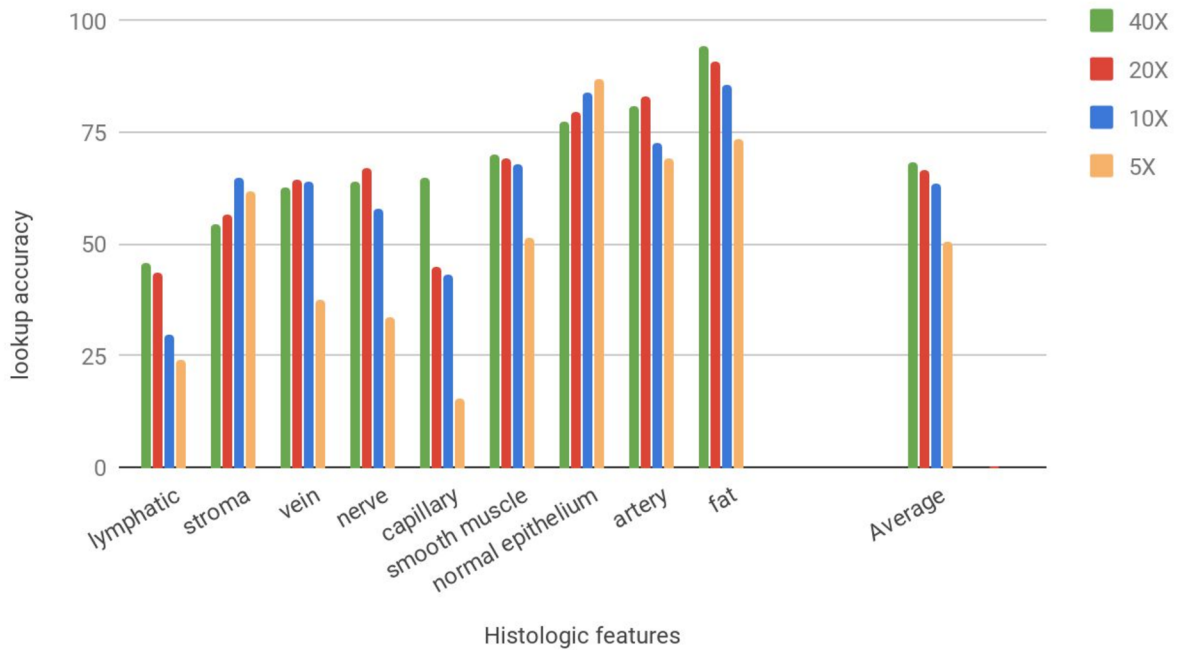

**Supplementary Fig. 1 | Top-5 score for histology match using SMILY at different magnifications.** The 5X magnification results are lower because there are substantially fewer image patches per slides at that magnification, of which even fewer pass the 1,000-pixel filter used to enhance search result diversity.

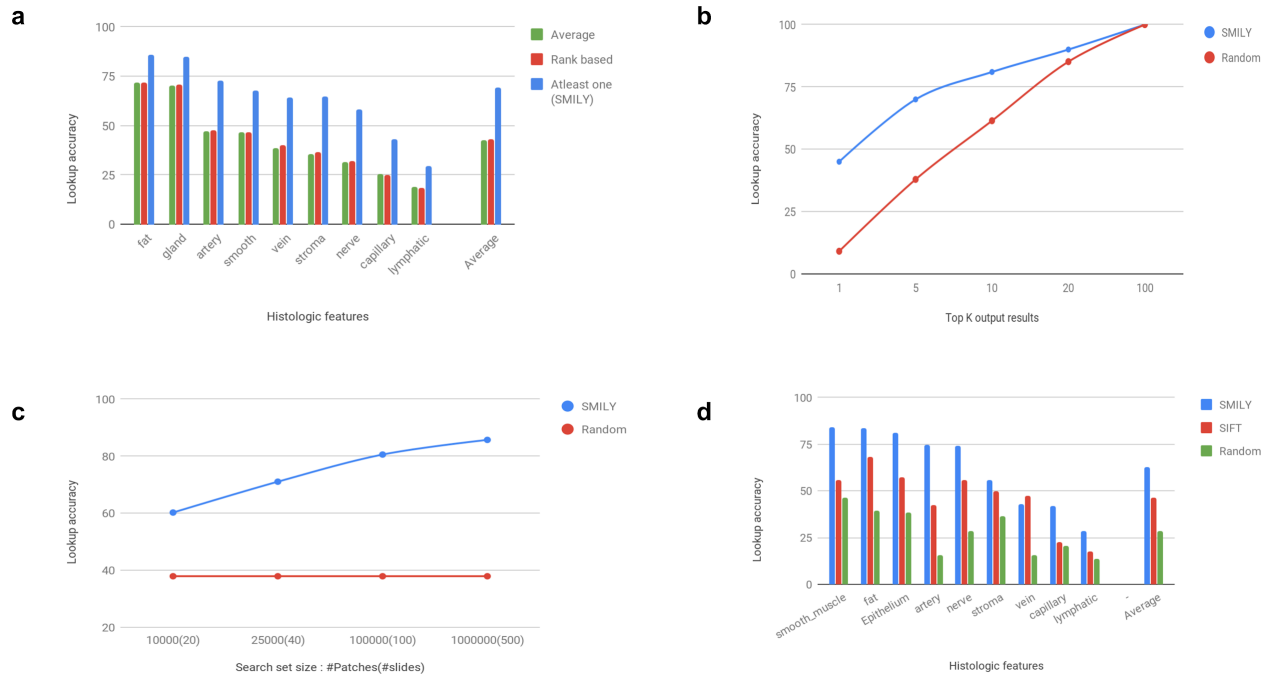

**Supplementary Fig. 2 | Additional performance metrics for SMILY. (a)** Comparison different metrics: averaging the histology match (1/0), weighted based on rank in the search results, and at-least-one (top-5 score). **(b)** Comparison of different values of "k" in the top-k score (results for histologic feature match in prostate specimens). **(c)** Effect of search database size (results for gleason cancer grade match in prostate specimens). **(d)** Top-5 score when searching the original annotations in prostate specimens (without resample to ensure uniform distribution of histologic features).

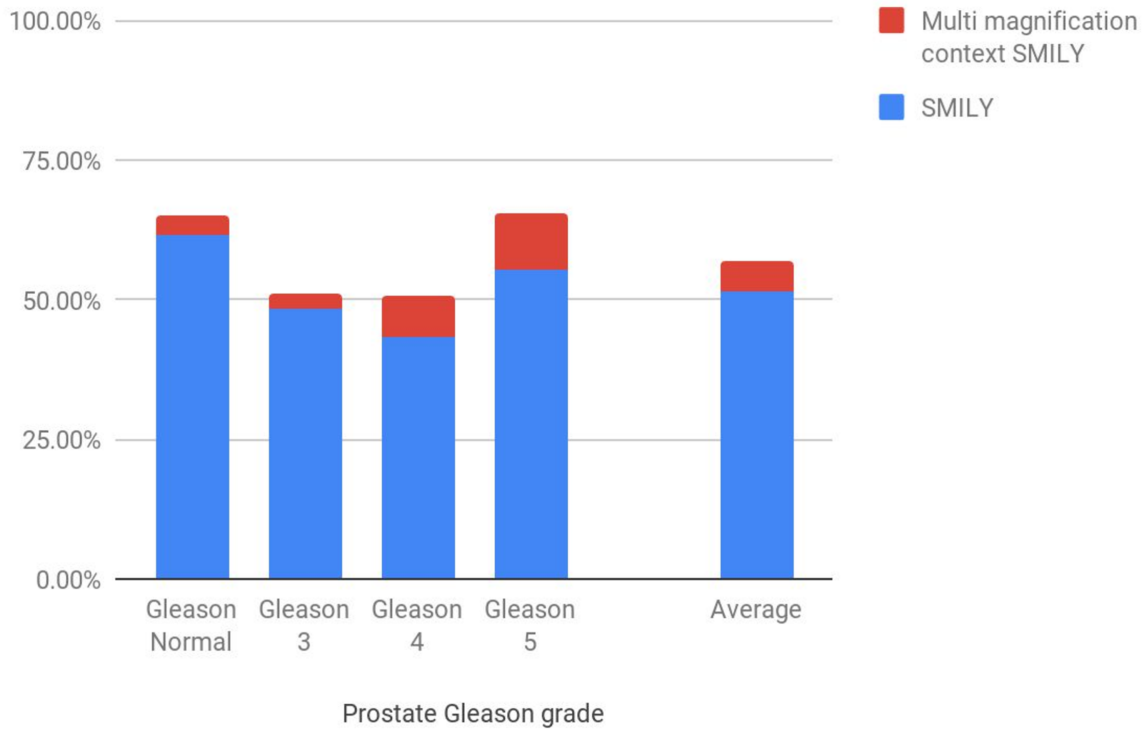

**Supplementary Fig. 3 | Comparing the use of a single magnification (in blue) versus multiple magnifications simultaneously (in red) for retrieving patches with similar Gleason patterns.** For a query patch at 10X magnification, the multi-magnification embedding is the concatenation of embeddings computed at 5X, 10X, and 4 image patches at 20X (to capture the entire 10X image). For better accuracy, these experiments were run using a larger dataset<sup>3</sup> (that did not have histologic feature annotations) than other results presented in this paper.

a

**SMILY**

Magnification: 10X

**FEEDBACK COLLECTION: All Organ Histology Experiment (all\_organ\_exp)**  
 If any of the following questions/ratings are not applicable or cannot reasonably be answered with the information provided, please leave them unselected and provide a comment if applicable.  
 1. For each patch below, rate histology and organ type similarity to the reference patch. (See the [instructions](#) for a precise definition of histological/organ similarity.)

|                                                                                                                                     |                                                                                                                                     |                                                                                                                                     |                                                                                                                                     |
|-------------------------------------------------------------------------------------------------------------------------------------|-------------------------------------------------------------------------------------------------------------------------------------|-------------------------------------------------------------------------------------------------------------------------------------|-------------------------------------------------------------------------------------------------------------------------------------|
| <p><b>A. Is the histology similar?</b></p> <input type="radio"/> NO <input checked="" type="radio"/> YES                            | <p><b>A. Is the histology similar?</b></p> <input type="radio"/> NO <input checked="" type="radio"/> YES                            | <p><b>A. Is the histology similar?</b></p> <input type="radio"/> NO <input checked="" type="radio"/> YES                            | <p><b>A. Is the histology similar?</b></p> <input type="radio"/> NO <input checked="" type="radio"/> YES                            |
| <p><b>B. Is the organ type similar?</b></p> <input type="radio"/> NO <input checked="" type="radio"/> YES <input type="radio"/> N/A | <p><b>B. Is the organ type similar?</b></p> <input type="radio"/> NO <input checked="" type="radio"/> YES <input type="radio"/> N/A | <p><b>B. Is the organ type similar?</b></p> <input type="radio"/> NO <input checked="" type="radio"/> YES <input type="radio"/> N/A | <p><b>B. Is the organ type similar?</b></p> <input type="radio"/> NO <input checked="" type="radio"/> YES <input type="radio"/> N/A |
| <p>Organ: Prostate<br/>Label: artery<br/>Comments: artery,<br/>G</p>                                                                | <p>Organ: Prostate<br/>Label: fat<br/>Comments: fat, nerve,<br/>G</p>                                                               | <p>Organ: Colon<br/>Label: artery<br/>Comments: artery, fat,<br/>G</p>                                                              | <p>Organ: Prostate<br/>Label: nerve<br/>Comments: fat, nerve,<br/>G</p>                                                             |

2. How diversely relevant are these patches? (See the [instructions](#) for a precise definition of histological/organ diversity.)

NO  YES

3. Any additional comments?

Additional comments

**SUBMIT ALL FEEDBACK**

b

**SMILY**

Magnification: 10X

**FEEDBACK COLLECTION: All Organ Histology Experiment (all\_organ\_exp)**  
 If any of the following questions/ratings are not applicable or cannot reasonably be answered with the information provided, please leave them unselected and provide a comment if applicable.  
 1. For each patch below, rate histology and organ type similarity to the reference patch. (See the [instructions](#) for a precise definition of histological/organ similarity.)

|                                                                                                                                     |                                                                                                                                     |                                                                                                                                     |                                                                                                                                     |
|-------------------------------------------------------------------------------------------------------------------------------------|-------------------------------------------------------------------------------------------------------------------------------------|-------------------------------------------------------------------------------------------------------------------------------------|-------------------------------------------------------------------------------------------------------------------------------------|
| <p><b>A. Is the histology similar?</b></p> <input type="radio"/> NO <input checked="" type="radio"/> YES                            | <p><b>A. Is the histology similar?</b></p> <input type="radio"/> NO <input checked="" type="radio"/> YES                            | <p><b>A. Is the histology similar?</b></p> <input type="radio"/> NO <input checked="" type="radio"/> YES                            | <p><b>A. Is the histology similar?</b></p> <input type="radio"/> NO <input checked="" type="radio"/> YES                            |
| <p><b>B. Is the organ type similar?</b></p> <input type="radio"/> NO <input checked="" type="radio"/> YES <input type="radio"/> N/A | <p><b>B. Is the organ type similar?</b></p> <input type="radio"/> NO <input checked="" type="radio"/> YES <input type="radio"/> N/A | <p><b>B. Is the organ type similar?</b></p> <input type="radio"/> NO <input checked="" type="radio"/> YES <input type="radio"/> N/A | <p><b>B. Is the organ type similar?</b></p> <input type="radio"/> NO <input checked="" type="radio"/> YES <input type="radio"/> N/A |
| <p>Organ: Colon<br/>Label: normal epithelium<br/>Comments: normal epithelium,<br/>G</p>                                             | <p>Organ: Colon<br/>Label: normal epithelium<br/>Comments: normal epithelium,<br/>G</p>                                             | <p>Organ: Colon<br/>Label: normal epithelium<br/>Comments: normal epithelium,<br/>G</p>                                             | <p>Organ: Colon<br/>Label: normal epithelium<br/>Comments: normal epithelium,<br/>G</p>                                             |

2. How diversely relevant are these patches? (See the [instructions](#) for a precise definition of histological/organ diversity.)

NO  YES

3. Any additional comments?

Additional comments

**SUBMIT ALL FEEDBACK**

c

**SMILY**

Magnification: 10X

**FEEDBACK COLLECTION: All Organ Histology Experiment (all\_organ\_exp)**  
 If any of the following questions/ratings are not applicable or cannot reasonably be answered with the information provided, please leave them unselected and provide a comment if applicable.  
 1. For each patch below, rate histology and organ type similarity to the reference patch. (See the [instructions](#) for a precise definition of histological/organ similarity.)

|                                                                                                                                     |                                                                                                                                     |                                                                                                                                     |                                                                                                                                     |
|-------------------------------------------------------------------------------------------------------------------------------------|-------------------------------------------------------------------------------------------------------------------------------------|-------------------------------------------------------------------------------------------------------------------------------------|-------------------------------------------------------------------------------------------------------------------------------------|
| <p><b>A. Is the histology similar?</b></p> <input type="radio"/> NO <input checked="" type="radio"/> YES                            | <p><b>A. Is the histology similar?</b></p> <input type="radio"/> NO <input checked="" type="radio"/> YES                            | <p><b>A. Is the histology similar?</b></p> <input type="radio"/> NO <input checked="" type="radio"/> YES                            | <p><b>A. Is the histology similar?</b></p> <input type="radio"/> NO <input checked="" type="radio"/> YES                            |
| <p><b>B. Is the organ type similar?</b></p> <input type="radio"/> NO <input checked="" type="radio"/> YES <input type="radio"/> N/A | <p><b>B. Is the organ type similar?</b></p> <input type="radio"/> NO <input checked="" type="radio"/> YES <input type="radio"/> N/A | <p><b>B. Is the organ type similar?</b></p> <input type="radio"/> NO <input checked="" type="radio"/> YES <input type="radio"/> N/A | <p><b>B. Is the organ type similar?</b></p> <input type="radio"/> NO <input checked="" type="radio"/> YES <input type="radio"/> N/A |
| <p>Organ: Breast<br/>Label: normal breast<br/>Comments: normal breast,<br/>G</p>                                                    | <p>Organ: Breast<br/>Label: vein<br/>Comments: artery, vein,<br/>G</p>                                                              | <p>Organ: Breast<br/>Label: capillary<br/>Comments: capillary,<br/>G</p>                                                            | <p>Organ: Prostate<br/>Label: nerve<br/>Comments: nerve,<br/>G</p>                                                                  |

2. How diversely relevant are these patches? (See the [instructions](#) for a precise definition of histological/organ diversity.)

NO  YES

3. Any additional comments?

Additional comments

**SUBMIT ALL FEEDBACK**

**Supplementary Fig. 4 | Samples of SMILY similar image retrieval** **(a)** Query consists of a nerve from a prostate specimen, alongside stromal connective tissue, adipocytes, and blood vessels. The search results contained (1) connective tissue adjacent to a blood vessel, (2) a nerve adjacent to fat, (3) a blood vessel adjacent to fat, and (3) a nerve adjacent to fat and connective tissue. **(b)** Query consists of nerve, stroma, tumor, and a lymphatic vessel containing metastatic tumor from a breast specimen. The search results contained (1) a large tumor focus and stroma, (2) a nerve adjacent to stroma and muscle connective tissue, (3) a lymphatic vessel with stroma, and (4) a nerve adjacent to stroma and a blood vessel. **(c)** Query consists of colonic glands cut in cross and longitudinal sections. The search results all contained colonic glands with similar architecture.

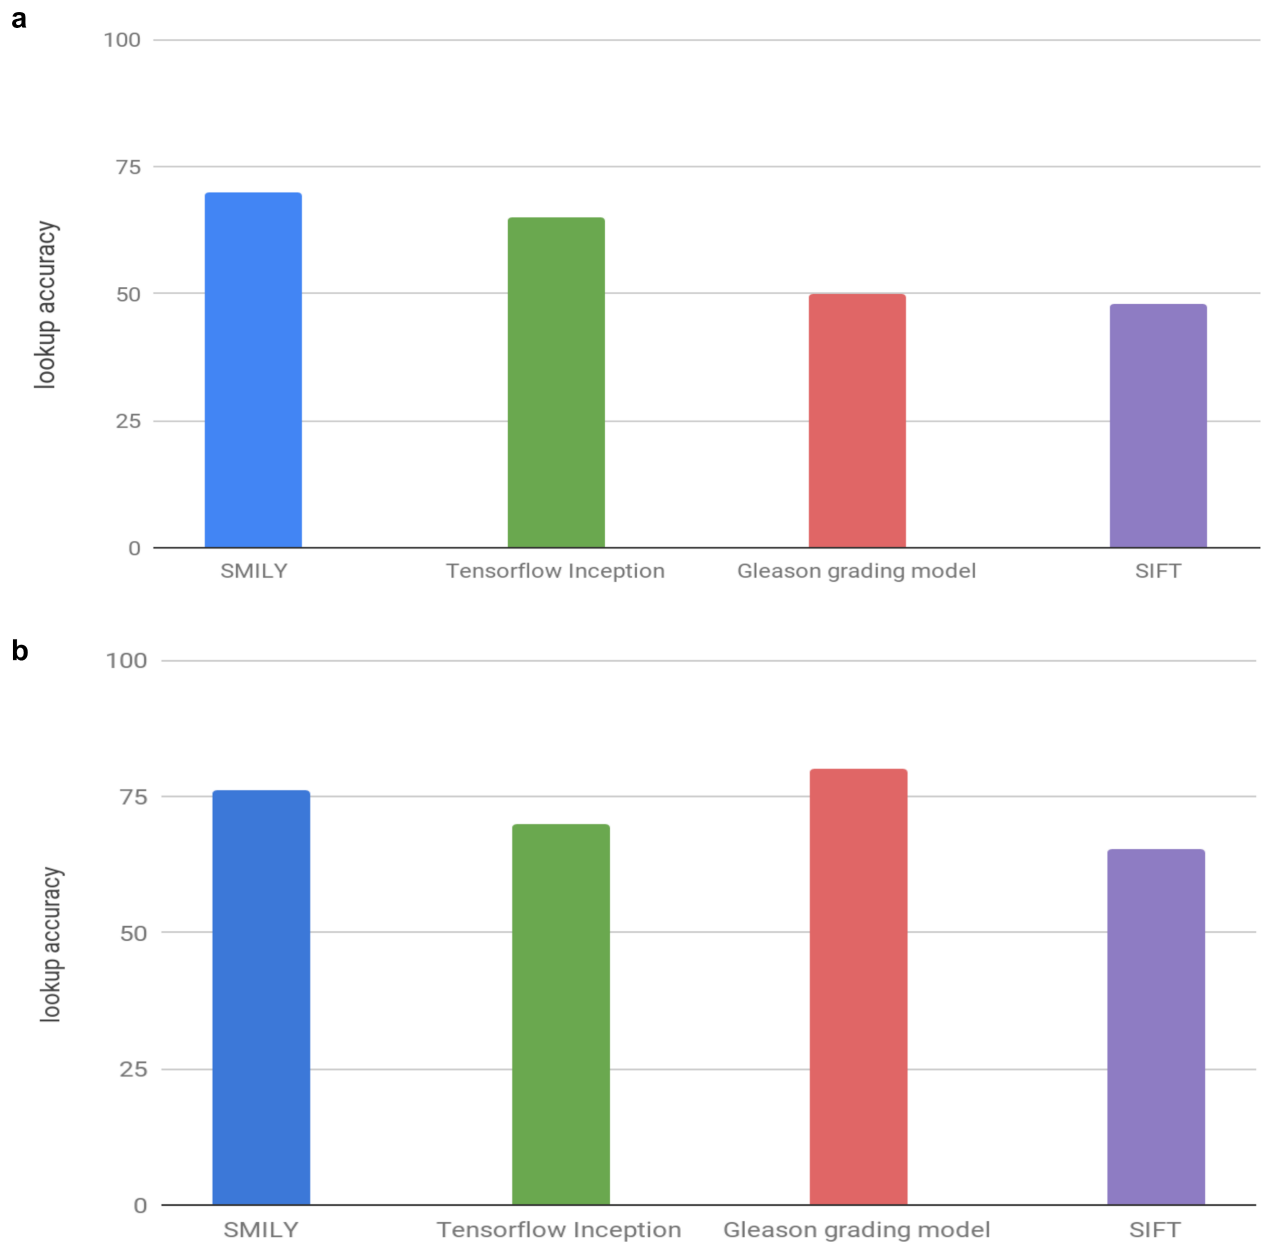

**Supplementary Fig. 5 | Comparison of using different pre-trained embedding generators:**

SMILY's deep ranking network, Inception (V3)<sup>1,2</sup>, a network trained for Gleason grading<sup>3</sup>, and scale-invariant feature transform (SIFT)<sup>4</sup> for retrieving **(a)** image patches with similar histologic features and **(b)** image patches with similar Gleason pattern.

## Supplementary References

1. Szegedy, C., Vanhoucke, V., Ioffe, S., Shlens, J. & Wojna, Z. Rethinking the Inception Architecture for Computer Vision. *arXiv [cs.CV]* (2015).
2. TensorFlow Hub. Available at:  
[https://tfhub.dev/google/imagenet/inception\\_v3/classification/1](https://tfhub.dev/google/imagenet/inception_v3/classification/1). (Accessed: 23rd January 2019)
3. Nagpal, K. *et al.* Development and Validation of a Deep Learning Algorithm for Improving Gleason Scoring of Prostate Cancer. *arXiv [cs.CV]* (2018).
4. Mehta, N., Alomari, R. S. & Chaudhary, V. Content based sub-image retrieval system for high resolution pathology images using salient interest points. *Conf. Proc. IEEE Eng. Med. Biol. Soc.* **2009**, 3719–3722 (2009).
